# Supplementary material
Source: HighWire-hosted journal article supplement (https://erj.ersjournals.com/content/59/3/2101181)
Supplement: inline-supplementary-material-1 [file inline-supplementary-material-1.pdf]

## SUPPLEMENTARY RESULTS

### **Title: Biomarker Signatures for Progressive Idiopathic Pulmonary Fibrosis**

Britt Clynick<sup>1,2,3#</sup>, Tamera J Corte<sup>1,4,5#</sup>, Helen E Jo<sup>1,4,5</sup>, Iain Stewart<sup>6</sup>, Ian N Glaspole<sup>7,8</sup>, Christopher Grainge<sup>9,10</sup>, Toby M Maher<sup>11</sup>, Vidya Navaratnam<sup>6,12</sup>, Richard Hubbard<sup>6</sup>, Peter MA Hopkins<sup>13,14</sup>, Paul N Reynolds<sup>15,16</sup>, Sally Chapman<sup>16</sup>, Christopher Zappala<sup>13</sup>, Gregory J Keir<sup>13</sup>, Wendy A Cooper<sup>4,5,17</sup>, Annabelle M Mahar<sup>5</sup>, Samantha Ellis<sup>8</sup>, Nicole Goh<sup>18,19</sup>, Emma De Jong<sup>2,3</sup>, Lilian Cha<sup>2,3</sup>, Dino BA Tan<sup>2,3</sup>, Lucy Leigh<sup>9,20</sup>, Christopher Oldmeadow<sup>9,20</sup>, E Haydn Walters<sup>1,8,21,22,23</sup>, R Gisli Jenkins<sup>6</sup>, Yuben Moodley<sup>1,2,3,24</sup>.

### **Corresponding author:**

Yuben Moodley

Institute for Respiratory Health Inc,

E Block, Sir Charles Gairdner Hospital

Nedlands, Western Australia 6009 AUSTRALIA

Email: [yuben.moodley@uwa.edu.au](mailto:yuben.moodley@uwa.edu.au)

Phone: +61 414 383 338

**Table S1 – Biomarkers selected for ELISA and Proteomic analysis in the AIPFR cohort.** Each ELISA biomarker is grouped according to its potential role in IPF pathogenesis, and the proteomic analytes are listed.

| <b>Biomarkers</b>                                                                           | <b>Abbreviations</b> |
|---------------------------------------------------------------------------------------------|----------------------|
| <b><u>ELISA</u></b>                                                                         |                      |
| <b><i>Inflammation</i></b>                                                                  |                      |
| C-reactive protein                                                                          | CRP                  |
| Intercellular adhesion molecule-1                                                           | ICAM1                |
| Vascular cell adhesion molecule-1                                                           | VCAM1                |
| Extracellular newly identified receptor for advanced glycation end-products binding protein | ENRAGE               |
| <b><i>Fibrosis</i></b>                                                                      |                      |
| Osteopontin                                                                                 | OPN                  |
| Periostin                                                                                   | POSTN                |
| Matrix metalloproteinase 7                                                                  | MMP7                 |
| Fibulin-1                                                                                   | FBLN1                |
| <b><i>Chemokines</i></b>                                                                    |                      |
| C-X-C motif chemokine ligand 13                                                             | CXCL13               |
| C-C motif chemokine ligand 18                                                               | CCL18                |
| <b><i>Lung physiology</i></b>                                                               |                      |
| Surfactant protein-A                                                                        | SPA                  |
| Surfactant protein-D                                                                        | SPD                  |
| <b><u>PROTEOMICS</u></b>                                                                    |                      |
| Lumican                                                                                     | LUM                  |
| N-acetylmuramoyl-L-alanine amidase                                                          | PGRP2                |
| Beta-2-glycoprotein 1                                                                       | B2GPI                |
| Complement component C9                                                                     | CO9                  |

|                                              |         |
|----------------------------------------------|---------|
| Fibronectin                                  | FN      |
| Inter-alpha-trypsin inhibitor heavy chain H1 | ITIH1   |
| Leucine-rich alpha-2-glycoprotein            | A2GL    |
| Apolipoprotein E                             | APOE    |
| Gelsolin                                     | GELS    |
| Pigment epithelium-derived factor            | PEDF    |
| Alpha-1-antichymotrypsin                     | AACT    |
| Apolipoprotein C-I                           | APOCI   |
| Apolipoprotein C-II                          | APOCII  |
| Apolipoprotein C-III                         | APOCIII |
| Serum amyloid A-4 protein                    | SAA4    |

---

**Figure S1 – A comparison of unadjusted estimates of progression index with disease progression.** Adjusted estimates as reported (FVC, age, gender, BMI) and adjusted sensitivity estimates for DLCO (DLCO, age, gender, BMI), demonstrating comparable findings across TLF, AIPFR and pooled in multilevel analysis.

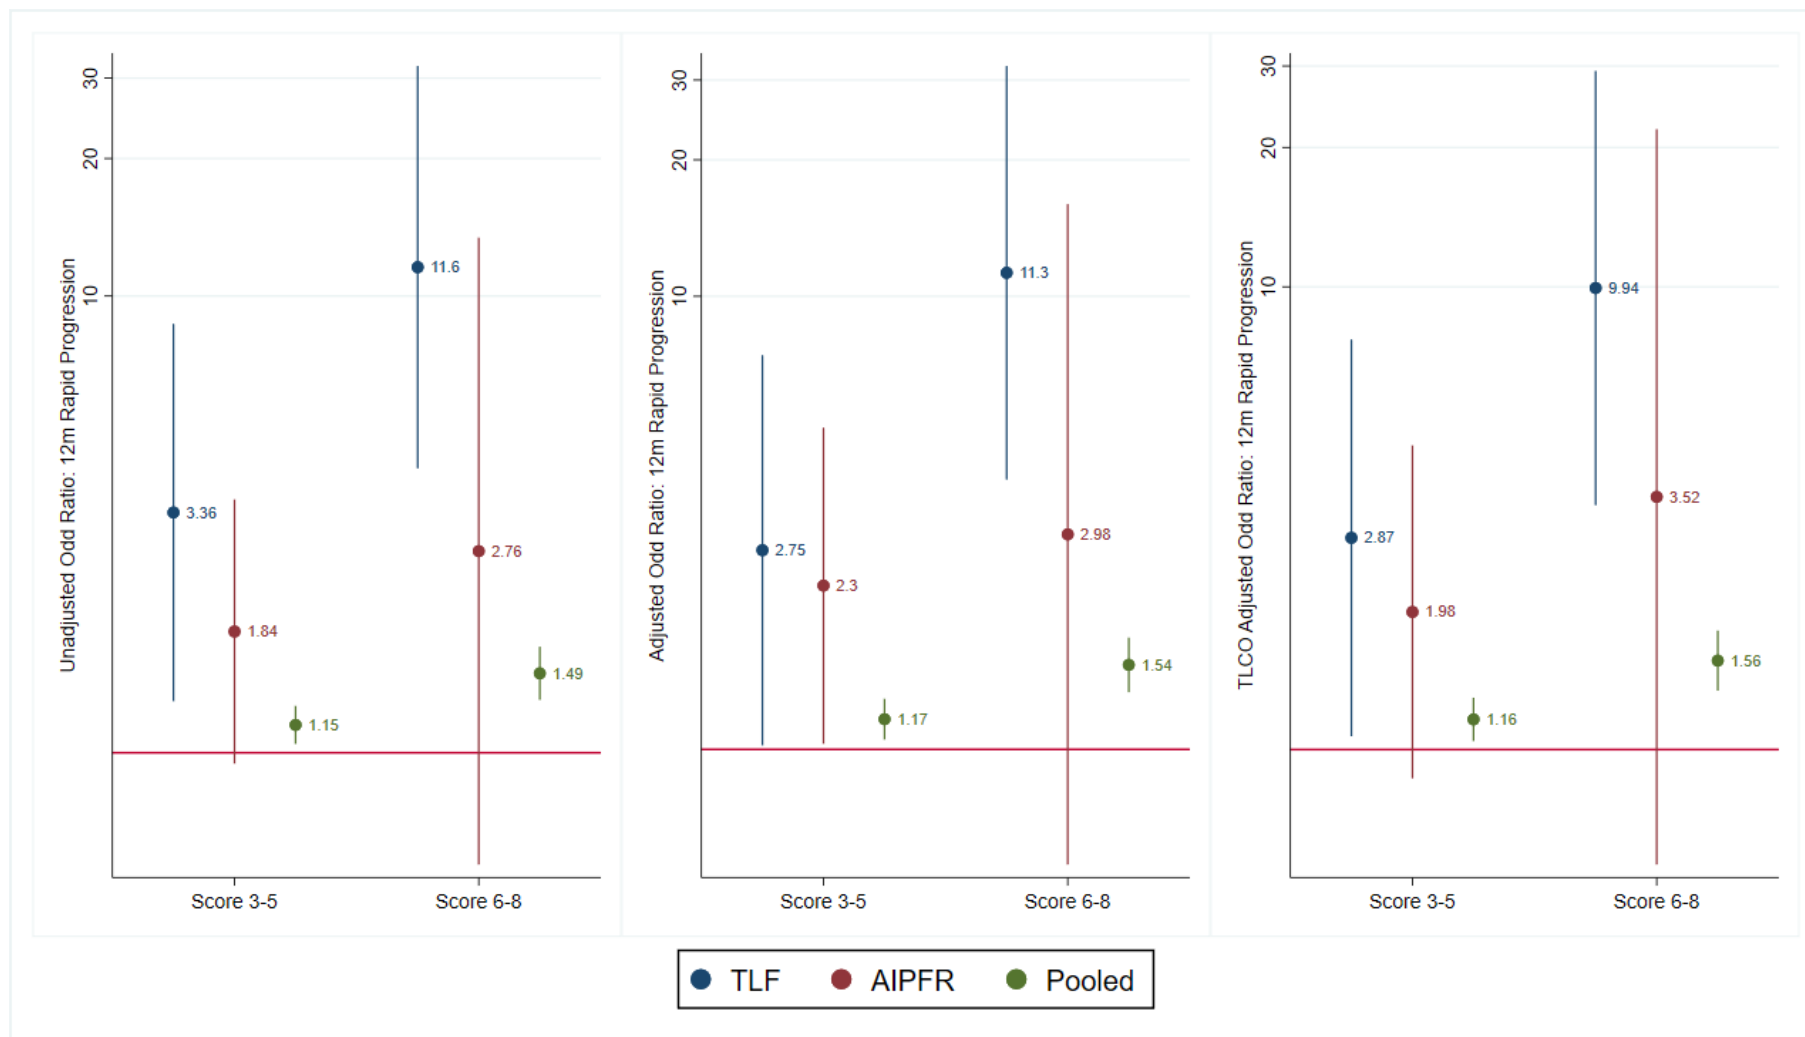

**Figure S2 – CONSORT diagram.**

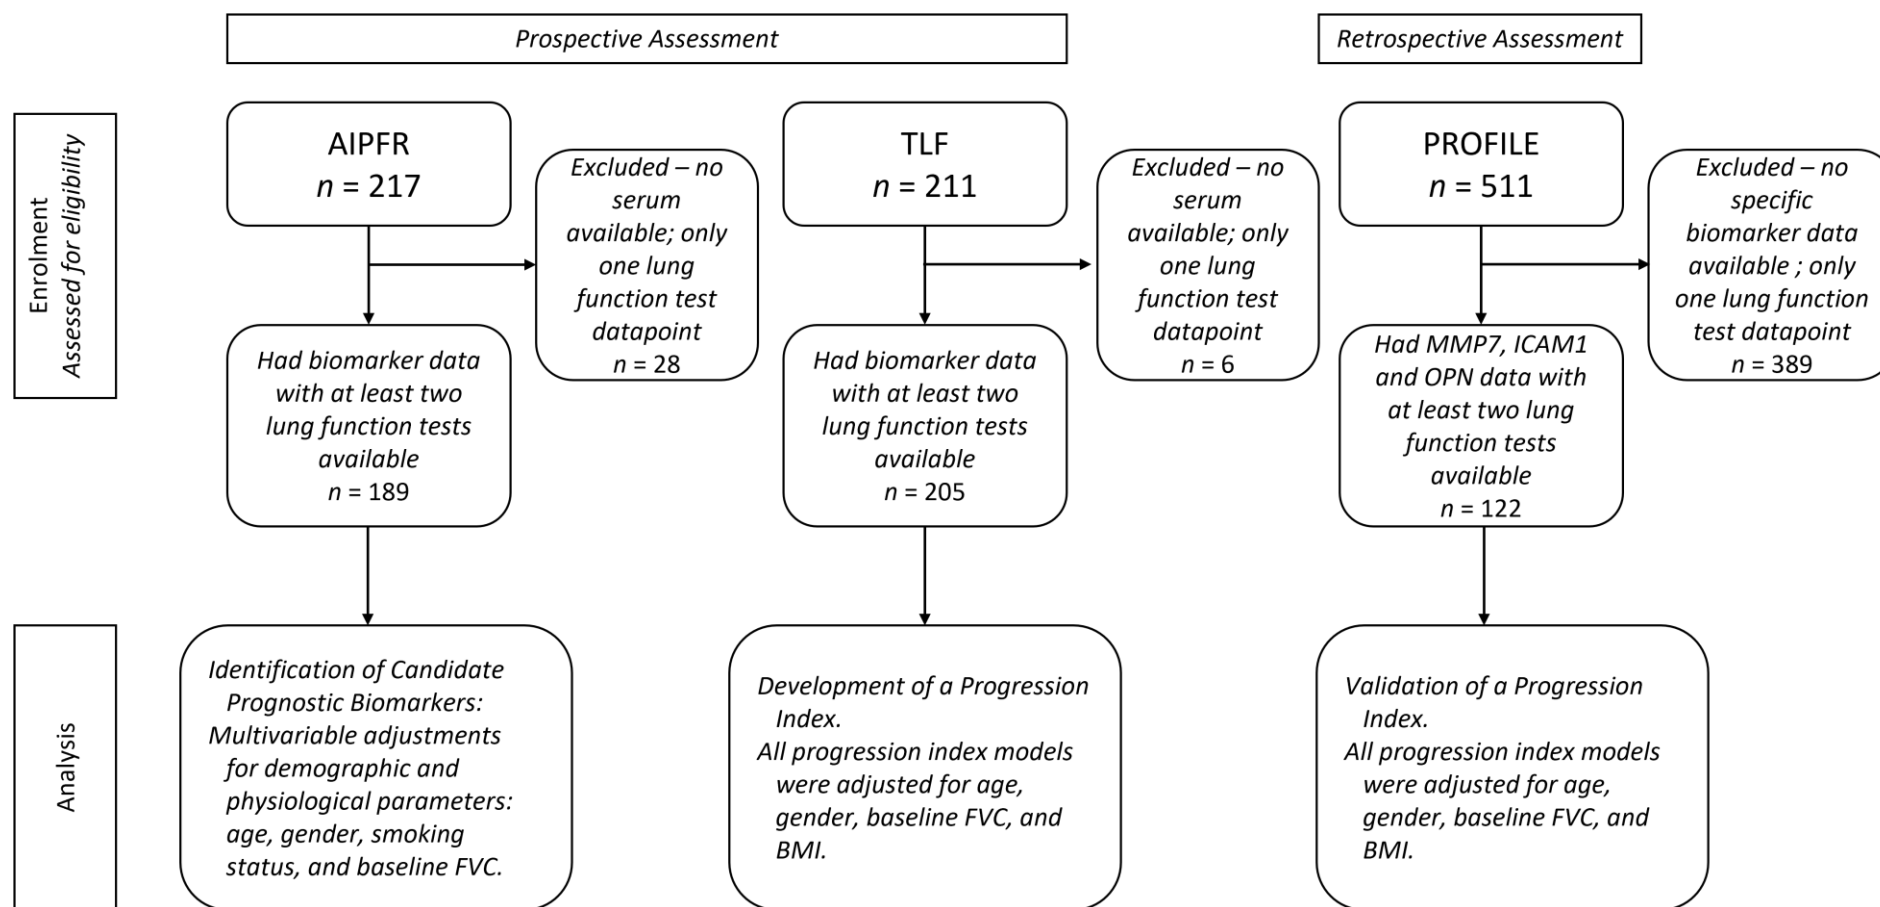

**Table S2 – Progression at 12 months outcome predicted by the LASSO model for biomarkers in AIPFR.** All coefficients are on the log-odds scale. Biomarkers that were shrunk to zero  $\leq 5\%$  of the repeated model are indicated in bold. Area under the curve (AUC) (95%CI) from empirical ROC curves for ELISA and proteomics biomarkers  $>0.6$  were more predictive of disease progression.

| <i>Biomarker</i>         | <i>n shrunk to 0</i> | <i>Mean (SD) of non-zero coefficients</i> | <i>AUC (95% CI)</i>      |
|--------------------------|----------------------|-------------------------------------------|--------------------------|
| <b><u>ELISA</u></b>      |                      |                                           |                          |
| SPA                      | 76                   | 0.00 (0.00)                               | 0.49 (0.40, 0.59)        |
| FBLN1                    | 58                   | -0.00 (0.00)                              | 0.53 (0.43, 0.63)        |
| <b>VCAM1</b>             | <b>3</b>             | <b>-0.00 (0.00)</b>                       | <b>0.55 (0.45, 0.65)</b> |
| CRP                      | 43                   | 0.00 (0.00)                               | 0.57 (0.47, 0.67)        |
| <b>SPD</b>               | <b>1</b>             | <b>0.01 (0.00)</b>                        | <b>0.60 (0.51, 0.70)</b> |
| <b>ENRAGE</b>            | <b>1</b>             | <b>0.00 (0.00)</b>                        | <b>0.60 (0.50, 0.70)</b> |
| <b>ICAM1</b>             | <b>2</b>             | <b>0.00 (0.00)</b>                        | <b>0.62 (0.54, 0.71)</b> |
| MMP7                     | 76                   | -0.00 (0.00)                              | 0.62 (0.53, 0.70)        |
| <b>OPN</b>               | <b>0</b>             | <b>-1.22 (0.20)</b>                       | <b>0.63 (0.53, 0.73)</b> |
| CXCL13                   | 31                   | 0.00 (0.00)                               | 0.65 (0.56, 0.74)        |
| <b>POSTN</b>             | <b>0</b>             | <b>0.01 (0.00)</b>                        | <b>0.65 (0.56, 0.74)</b> |
| <b><u>PROTEOMICS</u></b> |                      |                                           |                          |
| FN                       | 100                  | 0.00 (0.00)                               | 0.47 (0.36, 0.58)        |
| LUM                      | 47                   | 0.05 (0.08)                               | 0.51 (0.39, 0.62)        |
| APOCI                    | 100                  | 0.00 (0.00)                               | 0.52 (0.41, 0.63)        |
| APOCII                   | 100                  | 0.00 (0.00)                               | 0.53 (0.42, 0.64)        |
| CO9                      | 97                   | 0.00 (0.02)                               | 0.54 (0.44, 0.65)        |
| AACT                     | 20                   | 0.27 (0.22)                               | 0.55 (0.43, 0.66)        |
| APOCIII                  | 20                   | 0.12 (0.11)                               | 0.55 (0.44, 0.66)        |

|             |          |                     |                          |
|-------------|----------|---------------------|--------------------------|
| <b>SAA4</b> | <b>4</b> | <b>-1.02 (0.41)</b> | <b>0.55 (0.44, 0.66)</b> |
| <b>APOE</b> | <b>1</b> | <b>1.62 (0.45)</b>  | <b>0.55 (0.44, 0.67)</b> |
| B2GPI       | 100      | 0.00 (0.00)         | 0.59 (0.48, 0.69)        |
| ITIH1       | 5        | -0.49 (0.24)        | 0.62 (0.51, 0.73)        |
| <b>A2GL</b> | <b>0</b> | <b>0.71 (0.10)</b>  | <b>0.62 (0.52, 0.72)</b> |
| <b>PEDF</b> | <b>4</b> | <b>-1.12 (0.45)</b> | <b>0.62 (0.52, 0.72)</b> |
| PGRP2       | 97       | 0.02 (0.13)         | 0.63 (0.52, 0.73)        |
| <b>GELS</b> | <b>0</b> | <b>-2.44 (0.21)</b> | <b>0.66 (0.55, 0.76)</b> |

---

*Abbreviations: SD, standard deviation; AUC, area under the curve; CI, confidence interval.*

**Table S3 – Univariable analyses of the ELISA and Proteomics biomarkers associated with PFS and mortality in the AIPFR cohort.** All outcomes were regressed on each ELISA biomarker in separate univariable Cox proportional hazards models (using SAS PHREG). P-values which remain significant after adjustment have been indicated in bold.

| Biomarker                | Progression-free Survival |                            |                   | Mortality  |                            |                   |
|--------------------------|---------------------------|----------------------------|-------------------|------------|----------------------------|-------------------|
|                          | n                         | Hazard Ratio<br>(95% CI)   | p-value           | n          | Hazard Ratio<br>(95% CI)   | p-value           |
| <b><u>ELISA</u></b>      |                           |                            |                   |            |                            |                   |
| CCL18                    | 191                       | 1.003 (0.994,1.013)        | 0.5025            | 191        | 1.002 (0.991,1.014)        | 0.7117            |
| CRP                      | 190                       | 1.009 (0.987,1.032)        | 0.4340            | 190        | 1.013 (0.989,1.038)        | 0.3013            |
| CXCL13                   | 191                       | 1.000 (0.999,1.001)        | 0.9200            | 191        | 1.000 (0.999,1.001)        | 0.7853            |
| <b>ENRAGE</b>            | <b>189</b>                | <b>1.002 (1.000,1.004)</b> | <b>0.0125</b>     | <b>189</b> | <b>1.003 (1.001,1.005)</b> | <b>0.0058</b>     |
| FBLN1                    | 190                       | 1.001 (0.997,1.004)        | 0.7326            | 190        | 0.998 (0.993,1.003)        | 0.3602            |
| <b>ICAM1</b>             | <b>191</b>                | <b>1.002 (1.000,1.004)</b> | <b>0.0125</b>     | 191        | 1.001 (0.999,1.003)        | 0.4478            |
| MMP7                     | 191                       | 1.000 (1.000,1.000)        | 0.1727            | 191        | 1.000 (1.000,1.000)        | 0.3914            |
| MUC1                     | 49                        | 1.006 (0.959,1.055)        | 0.8116            | 49         | 1.009 (0.960,1.060)        | 0.7191            |
| <b>OPN</b>               | <b>191</b>                | <b>1.021 (1.012,1.030)</b> | <b>&lt;0.0001</b> | <b>191</b> | <b>1.024 (1.014,1.034)</b> | <b>&lt;0.0001</b> |
| <b>POSTN</b>             | <b>189</b>                | <b>1.012 (1.004,1.020)</b> | <b>0.0046</b>     | <b>189</b> | <b>1.011 (1.000,1.021)</b> | <b>0.0450</b>     |
| SPA                      | 190                       | 1.000 (0.996,1.003)        | 0.8965            | 190        | 1.001 (0.997,1.005)        | 0.6821            |
| <b>SPD</b>               | <b>184</b>                | <b>1.026 (1.012,1.039)</b> | <b>0.0001</b>     | 184        | 1.016 (0.999,1.033)        | 0.0639            |
| VCAM1                    | 190                       | 1.000 (1.000,1.000)        | 0.6137            | 190        | 1.000 (1.000,1.000)        | 0.8697            |
| <b><u>PROTEOMICS</u></b> |                           |                            |                   |            |                            |                   |
| LUM                      | 157                       | 1.354 (0.888,2.064)        | 0.1594            | 157        | 1.150 (0.659,2.004)        | 0.6233            |
| PGRP2                    | 157                       | 0.918 (0.258,3.263)        | 0.8945            | 157        | 0.353 (0.055,2.256)        | 0.2710            |
| B2GPI                    | 157                       | 1.041 (0.856,1.267)        | 0.6855            | 157        | 0.805 (0.528,1.226)        | 0.3123            |
| <b>CO9</b>               | 157                       | <b>1.349 (1.010,1.802)</b> | <b>0.0424</b>     | 157        | 1.215 (0.823,1.793)        | 0.3281            |



|             |            |                            |               |            |                            |               |
|-------------|------------|----------------------------|---------------|------------|----------------------------|---------------|
| FN          | 157        | 0.599 (0.153,2.348)        | 0.4623        | 157        | 0.819 (0.184,3.656)        | 0.7940        |
| ITIH1       | 157        | 1.080 (0.810,1.440)        | 0.6006        | 157        | 0.610 (0.283,1.315)        | 0.2070        |
| <b>A2GL</b> | 157        | <b>1.215 (1.023,1.443)</b> | <b>0.0266</b> | 157        | 1.181 (0.965,1.446)        | 0.1074        |
| <b>APOE</b> | 157        | <b>1.421 (1.022,1.975)</b> | <b>0.0366</b> | 157        | 1.264 (0.813,1.965)        | 0.2977        |
| GELS        | 157        | 0.714 (0.248,2.057)        | 0.5330        | 157        | 0.216 (0.048,0.977)        | 0.0465        |
| PEDF        | 157        | 0.938 (0.405,2.172)        | 0.8814        | 157        | 0.486 (0.141,1.681)        | 0.2547        |
| <b>AACT</b> | <b>157</b> | <b>1.611 (1.213,2.140)</b> | <b>0.0010</b> | <b>157</b> | <b>1.539 (1.093,2.167)</b> | <b>0.0135</b> |
| APOCI       | 137        | 1.600 (0.553,4.631)        | 0.3856        | 137        | 1.545 (0.478,4.996)        | 0.4671        |
| APOCII      | 151        | 1.377 (0.442,4.289)        | 0.5812        | 151        | 1.702 (0.519,5.578)        | 0.3797        |
| APOCIII     | 144        | 1.360 (0.742,2.494)        | 0.3201        | 144        | 1.580 (0.863,2.893)        | 0.1384        |
| SAA4        | 154        | 1.094 (0.553,2.163)        | 0.7968        | 154        | 0.853 (0.356,2.045)        | 0.7217        |

---

*Abbreviations: CI, confidence interval.*

**Table S4 – Area under the curve (95%CI) of continuous and tertiles from empirical ROC curves for ELISA and Proteomics biomarkers predicting disease progression in TLF.**

| <b>Biomarker</b>         | <b>AUROC</b> | <b>95%CI</b> | <b>p-value*</b> | <b>Tert 1</b> | <b>Tert 2</b> | <b>Tert 3</b> | <b>AUROC</b> | <b>95%CI</b> | <b>p-value*</b> |
|--------------------------|--------------|--------------|-----------------|---------------|---------------|---------------|--------------|--------------|-----------------|
| <b><u>ELISA</u></b>      |              |              |                 |               |               |               |              |              |                 |
| SPD                      | 0.56         | (0.47; 0.64) | 0.7822          | 19.70         | 38.06         | 78.82         | 0.55         | (0.47; 0.63) | 0.7173          |
| OPN                      | 0.61         | (0.54 ;0.69) | 0.4616          | 16.23         | 24.96         | 36.43         | 0.61         | (0.54; 0.69) | 0.4652          |
| MMP7                     | 0.64         | (0.56; 0.71) | 0.3097          | 1.87          | 2.98          | 4.43          | 0.63         | (0.56; 0.70) | 0.3589          |
| ICAM1                    | 0.67         | (0.60; 0.75) | 0.0852          | 218.09        | 347.58        | 619.40        | 0.64         | (0.60; 0.72) | 0.2042          |
| POSTN                    | 0.67         | (0.59; 0.75) | 0.0865          | 27.76         | 44.62         | 80.97         | 0.66         | (0.59; 0.74) | 0.0948          |
| <b><u>PROTEOMICS</u></b> |              |              |                 |               |               |               |              |              |                 |
| PGRP2                    | 0.55         | (0.46; 0.63) | 0.6243          | 1.83          | 2.65          | 3.94          | 0.54         | (0.46; 0.62) | 0.5575          |
| CO9                      | 0.52         | (0.44; 0.60) | 0.3615          | 5.61          | 8.14          | 12.11         | 0.51         | (0.43; 0.59) | 0.2629          |
| A2GL                     | 0.52         | (0.43; 0.60) | 0.3061          | 3.83          | 6.03          | 9.76          | 0.52         | (0.44; 0.61) | 0.3671          |
| APOE                     | 0.49         | (0.41; 0.58) | 0.2003          | 1.01          | 1.62          | 2.46          | 0.51         | (0.43; 0.59) | 0.3073          |
| GELS                     | 0.56         | (0.48; 0.64) | 0.8110          | 1.01          | 1.51          | 2.41          | 0.55         | (0.47; 0.63) | 0.6646          |
| PEDF                     | 0.54         | (0.46; 0.63) | 0.6140          | 1.52          | 2.29          | 3.04          | 0.55         | (0.47; 0.62) | 0.6571          |
| AACT                     | 0.55         | (0.46; 0.63) | 0.6554          | 4.46          | 6.95          | 11.75         | 0.55         | (0.47; 0.63) | 0.7406          |
| SAA4                     | 0.55         | (0.47; 0.64) | 0.7697          | 0.40          | 0.65          | 1.04          | 0.56         | (0.48; 0.64) | 0.8533          |

*Median tertile value: ELISA as ng/ml, Proteomics as 180 ratio. \*p-value for difference from GAP AUROC.*

**Table S5 – Odds ratio of tertiles for disease progression in TLF.** Tertile 3 versus Tertile 1. Significant values are indicated in bold. \* includes odds ratios adjusted for age, gender, ppFVC and BMI

| <b>Biomarker</b>         | <b>OR</b> | <b>95%CI</b> | <b>p-value</b>   | <b>OR*</b> | <b>95%CI</b> | <b>p-value</b>   |
|--------------------------|-----------|--------------|------------------|------------|--------------|------------------|
| <b><u>ELISA</u></b>      |           |              |                  |            |              |                  |
| SPD                      | 1.63      | (0.79; 3.35) | 0.185            | 1.11       | (0.65;2.98)  | 0.399            |
| OPN                      | 3.13      | (1.42; 6.90) | <b>0.005</b>     | 3.40       | (1.41;8.24)  | <b>0.007</b>     |
| MMP7                     | 3.89      | (1.69; 8.91) | <b>0.001</b>     | 4.05       | (1.70;9.61)  | <b>0.002</b>     |
| ICAM1                    | 4.16      | (1.86; 9.31) | <b>0.001</b>     | 5.33       | (2.21;12.84) | <b>&lt;0.001</b> |
| POSTN                    | 4.57      | (2.12; 9.87) | <b>&lt;0.001</b> | 4.04       | (1.73; 9.44) | <b>0.001</b>     |
| <b><u>PROTEOMICS</u></b> |           |              |                  |            |              |                  |
| PGRP2                    | 1.41      | (0.70; 2.88) | 0.338            | 0.87       | (0.39;1.95)  | 0.734            |
| CO9                      | 1.09      | (0.53; 2.28) | 0.809            | 1.22       | (0.57;2.63)  | 0.604            |
| A2GL                     | 1.24      | (0.61; 2.50) | 0.551            | 1.06       | (0.50;2.23)  | 0.883            |
| APOE                     | 1.09      | (0.53; 2.25) | 0.546            | 1.13       | (0.53;2.42)  | 0.754            |
| GELS                     | 1.53      | (0.74; 3.16) | 0.250            | 1.55       | (0.71;3.35)  | 0.268            |
| PEDF                     | 1.56      | (0.74; 3.29) | 0.240            | 1.68       | (0.75;3.80)  | 0.209            |
| AACT                     | 1.63      | (0.79; 3.35) | 0.185            | 1.70       | (0.79;3.69)  | 0.177            |
| SAA4                     | 1.69      | (0.84; 3.39) | 0.142            | 1.84       | (0.87;3.89)  | 0.109            |

\*adjusted for age, gender, ppFVC, BMI

**Table S6 – Biomarker differences between progressor and stable groups in PROFILE.**

Only significant biomarkers identified in TLF have been displayed. Absolute values, median (IQR), non-parametric test. Significant values are indicated in bold.

| <b>Biomarker</b>      | <b>Unit</b> | <b>Stable median (IQR)</b> | <b>Progressive median (IQR)</b> | <b>p-value</b> |
|-----------------------|-------------|----------------------------|---------------------------------|----------------|
| <i>PROFILE Cohort</i> |             |                            |                                 |                |
| OPN                   | ng/ml       | 110 (63.5 – 150.0)         | 120 (79.0 – 190.0)              | 0.1204         |
| MMP7                  | ng/ml       | 0.91 (0.70 – 1.40)         | 1.1 (0.85 – 1.50)               | <b>0.0331</b>  |
| ICAM1                 | ng/ml       | 208 (159.0 – 276.5)        | 241 (195.0 – 314.0)             | <b>0.0352</b>  |
| POSTN                 | ng/ml       | NO OBSERVATIONS            |                                 |                |

*Note: proteomic unit is ratio of corrected unlabelled peak area/180 peak area.*

*Abbreviations: IQR, interquartile range.*

**Table S7 – Progression Index values percentage distribution across all cohorts.** Index created with four biomarkers based on tertiles: score 0,1,2 depending on T1, T2, T3 for each of four biomarkers (min 0, max 8). Number of people with positive biomarker per index value of 0-8.

| Index | TLF                 |                        |                           | AIPFR               |                        |                           | PROFILE             |                        |                           |
|-------|---------------------|------------------------|---------------------------|---------------------|------------------------|---------------------------|---------------------|------------------------|---------------------------|
|       | All<br>n=205<br>(%) | Stable<br>n=138<br>(%) | Progressor<br>n=67<br>(%) | All<br>n=189<br>(%) | Stable<br>n=136<br>(%) | Progressor<br>n=53<br>(%) | All<br>n=205<br>(%) | Stable<br>n=138<br>(%) | Progressor<br>n=67<br>(%) |
| 0     | 12 (5·9)            | 11 (8·0)               | 1 (1·5)                   | 17 (9)              | 14 (10·3)              | 3 (5·7)                   | 4 (3·3)             | 3 (4·4)                | 1 (1·9)                   |
| 1     | 13 (6·3)            | 12 (8·7)               | 1 (1·5)                   | 30 (15·9)           | 22 (16·2)              | 8 (15·1)                  | 0                   | 0                      | 0                         |
| 2     | 28 (13·7)           | 24 (17·4)              | 4 (6·0)                   | 42 (22·2)           | 34 (25)                | 8 (15·1)                  | 85 (69·7)           | 53 (77·9)              | 32 (59·3)                 |
| 3     | 35 (17·1)           | 28 (20·3)              | 7 (10·5)                  | 45 (23·8)           | 30 (22·1)              | 15 (28·3)                 | 25 (20·5)           | 10 (14·7)              | 15 (27·8)                 |
| 4     | 34 (16·6)           | 23 (16·7)              | 11 (16·4)                 | 30 (15·9)           | 18 (13·2)              | 12 (22·6)                 | 7 (5·7)             | 1 (1·5)                | 6 (11·1)                  |
| 5     | 31 (15·1)           | 19 (13·8)              | 12 (17·9)                 | 18 (9·5)            | 14 (10·3)              | 4 (7·5)                   | 1 (0·8)             | 1 (1·5)                | 0                         |
| 6     | 21 (10·2)           | 7 (5·1)                | 14 (20·9)                 | 7 (3·7)             | 4 (2·9)                | 3 (5·7)                   | 0                   | 0                      | 0                         |
| 7     | 23 (11·2)           | 10 (7·3)               | 13 (19·4)                 | 0                   | 0                      | 0                         | 0                   | 0                      | 0                         |
| 8     | 8 (3·9)             | 4 (2·9)                | 4 (6·0)                   | 0                   | 0                      | 0                         | 0                   | 0                      | 0                         |

### **TLF Cohort**

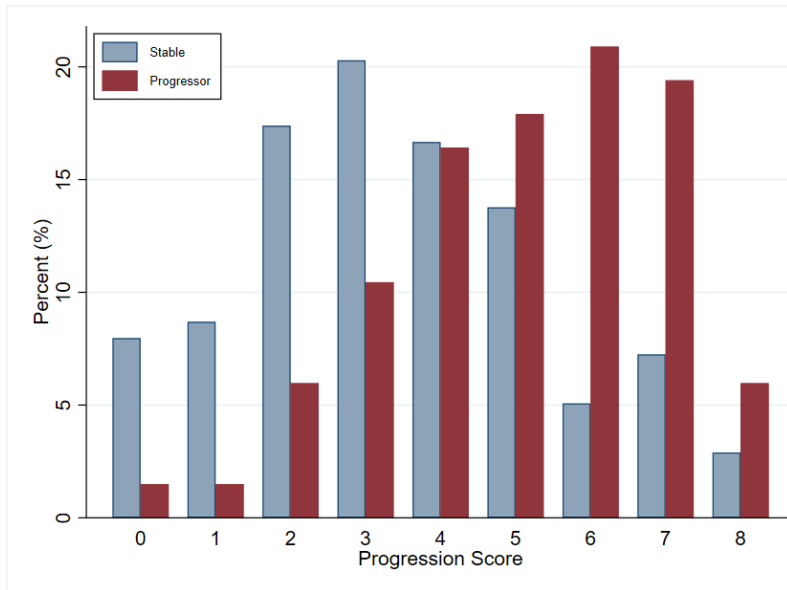

### **AIPFR Cohort**

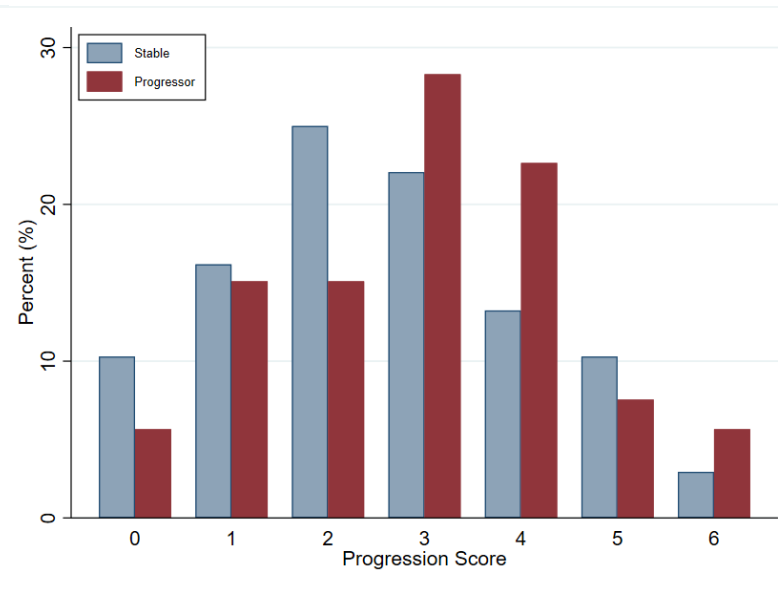

### **PROFILE Cohort**

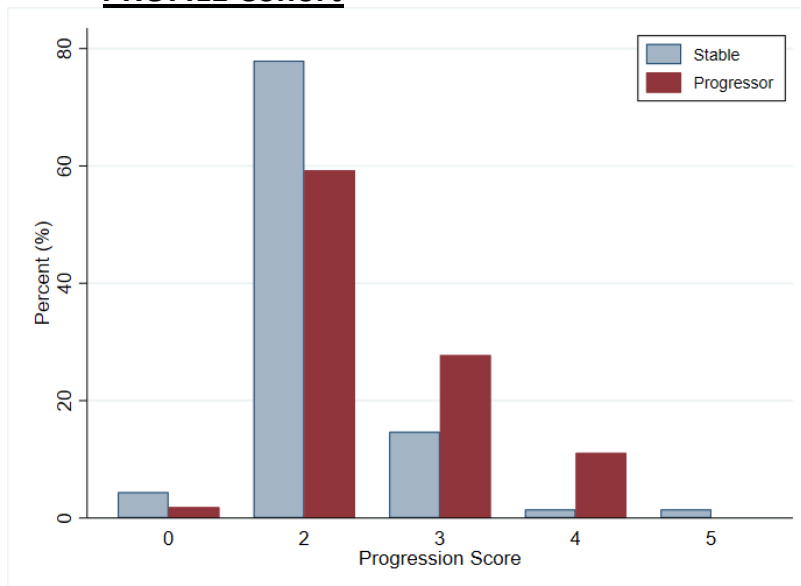

**Figure S3 – Progression Score value percentage distribution across all 3 cohorts.** Score created with four biomarkers (MMP7, ICAM1, OPN and POSTN) based on tertiles: score 0,1,2 depending on T1, T2, T3 for each of four biomarkers (min 0, max 8). Percentage of participants with progression scores between 0-8 have been totalled across all cohorts.

**Table S8 – Adjusted associations with outcome in PROFILE.** Prediction of progression at 12-months and mortality. Significant p-values are indicated in bold. Note: participants missing biomarker value for POSTN and no observations for PS 6-8.

| Score          | n  | OR*             | 95%CI        | p-value | HR mort*        | 95%CI        | p-value      |
|----------------|----|-----------------|--------------|---------|-----------------|--------------|--------------|
| <b>PROFILE</b> |    |                 |              |         |                 |              |              |
| <b>0-2</b>     | 89 | 1               |              |         | 1               |              |              |
| <b>3-5</b>     | 33 | 2·06            | (0·59; 7·24) | 0·258   | 2·23            | (1·02; 4·85) | <b>0·043</b> |
| <b>6-8</b>     | -  | No observations |              |         | No observations |              |              |

\*Adjusted for Age, gender, baseline ppFVC, BMI. Modelled with robust standard errors.

Abbreviations: OR, odds ratio; CI, confidence interval; HR, hazard ratio; mort, mortality; PFS, progression-free survival.
