# Supplementary material
Source: HighWire-hosted journal article supplement (https://erj.ersjournals.com/content/59/3/2101181)
Supplement: inline-supplementary-material-2 [file inline-supplementary-material-2.pdf]

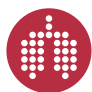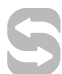

SHAREABLE PDF

# Biomarker signatures for progressive idiopathic pulmonary fibrosis

Britt Clynick<sup>1,2,3,25</sup>, Tamera J. Corte<sup>1,4,5,25</sup>, Helen E. Jo<sup>1,4,5</sup>, Iain Stewart<sup>6</sup>, Ian N. Glaspole<sup>7,8</sup>, Christopher Grainge<sup>9,10</sup>, Toby M. Maher<sup>11</sup>, Vidya Navaratnam<sup>6,12</sup>, Richard Hubbard<sup>6</sup>, Peter M.A. Hopkins<sup>13,14</sup>, Paul N. Reynolds<sup>15,16</sup>, Sally Chapman<sup>16</sup>, Christopher Zappala<sup>13</sup>, Gregory J. Keir<sup>13</sup>, Wendy A. Cooper<sup>4,5,17</sup>, Annabelle M. Mahar<sup>5</sup>, Samantha Ellis<sup>7,8</sup>, Nicole S. Goh<sup>18,19</sup>, Emma De Jong<sup>2,3</sup>, Lilian Cha<sup>2,3</sup>, Dino B.A. Tan<sup>10,2,3</sup>, Lucy Leigh<sup>9,20</sup>, Christopher Oldmeadow<sup>9,20</sup>, E. Haydn Walters<sup>1,8,21,22,23</sup>, R. Gisli Jenkins<sup>6</sup> and Yuben Moodley<sup>1,2,3,24</sup>

<sup>1</sup>Centre of Research Excellence in Pulmonary Fibrosis, Camperdown, Australia. <sup>2</sup>Institute for Respiratory Health Inc., Nedlands, Australia. <sup>3</sup>University of Western Australia, Crawley, Australia. <sup>4</sup>The University of Sydney Central Clinical School, Camperdown, Australia. <sup>5</sup>Royal Prince Alfred Hospital, Camperdown, Australia. <sup>6</sup>NIHR Biomedical Research Centre, Respiratory Theme, University of Nottingham, Nottingham, UK. <sup>7</sup>Monash University, Clayton, Australia. <sup>8</sup>Alfred Hospital, Melbourne, Australia. <sup>9</sup>University of Newcastle, Callaghan, Australia. <sup>10</sup>John Hunter Hospital, New Lambton Heights, Australia. <sup>11</sup>University of Southern California, Los Angeles, CA, USA. <sup>12</sup>Nottingham University Hospitals, Nottingham, UK. <sup>13</sup>University of Queensland, St Lucia, Australia. <sup>14</sup>Prince Charles Hospital, Chermide, Australia. <sup>15</sup>University of Adelaide, Adelaide, Australia. <sup>16</sup>Royal Adelaide Hospital, Adelaide, Australia. <sup>17</sup>Western Sydney University, Sydney, Australia. <sup>18</sup>Austin Hospital, Heidelberg, Australia. <sup>19</sup>Institute of Breathing and Sleep, Heidelberg, Australia. <sup>20</sup>Hunter Medical Research Institute, Newcastle, Australia. <sup>21</sup>University of Tasmania, Hobart, Australia. <sup>22</sup>University of Melbourne, Parkville, Australia. <sup>23</sup>Royal Hobart Hospital, Hobart, Australia. <sup>24</sup>Fiona Stanley Hospital, Murdoch, Australia. <sup>25</sup>These two authors are joint first authors.

Corresponding author: Yuben Moodley (yuben.moodley@uwa.edu.au)

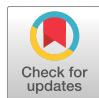

Shareable abstract (@ERSpublications)

**Pathobiologically relevant circulatory biomarkers were found to be associated with IPF progression and mortality, and a statistical model incorporating these markers into a progression index score showed improved prognostication across all outcomes** <https://bit.ly/37L0oMl>

**Cite this article as:** Clynick B, Corte TJ, Jo HE, *et al.* Biomarker signatures for progressive idiopathic pulmonary fibrosis. *Eur Respir J* 2022; 59: 2101181 [DOI: 10.1183/13993003.01181-2021].

This single-page version can be shared freely online.

Copyright ©The authors 2022.  
For reproduction rights and  
permissions contact  
[permissions@ersnet.org](mailto:permissions@ersnet.org)

Received: 25 April 2021  
Accepted: 3 Aug 2021

## Abstract

**Background** Idiopathic pulmonary fibrosis (IPF) is a progressive lung disease in which circulatory biomarkers have the potential for guiding management in clinical practice. We assessed the prognostic role of serum biomarkers in three independent IPF cohorts: Australian Idiopathic Pulmonary Fibrosis Registry (AIPFR), Trent Lung Fibrosis (TLF) and Prospective Observation of Fibrosis in the Lung Clinical Endpoints (PROFILE).

**Methods** In the AIPFR cohort, candidate proteins were assessed by ELISA as well as in an unbiased proteomic approach. LASSO (least absolute shrinkage and selection operator) regression was used to restrict the selection of markers that best accounted for the progressor phenotype at 1 year in the AIPFR cohort, and subsequently prospectively selected for replication in the validation TLF cohort and assessed retrospectively in the PROFILE cohort. Four significantly replicating biomarkers were aggregated into a progression index model based on tertiles of circulating concentrations.

**Results** 189 participants were included in the AIPFR cohort, 205 participants from the TLF cohort and 122 participants from the PROFILE cohort. Differential biomarker expression was observed by ELISA and replicated for osteopontin, matrix metalloproteinase-7, intercellular adhesion molecule-1 and periostin for those with a progressor phenotype at 1 year. Proteomic data did not replicate. The progression index in the AIPFR, TLF and PROFILE cohorts predicted risk of progression, mortality and progression-free survival. A statistical model incorporating the progression index demonstrated the capacity to distinguish disease progression at 12 months, which was increased beyond the clinical GAP (gender, age and physiology) score model alone in all cohorts, and significantly so within the incidence-based TLF and PROFILE cohorts.

**Conclusion** A panel of circulatory biomarkers can provide potentially valuable clinical assistance in the prognosis of IPF patients.
